# Supplementary material for: Correction: TreeSeq, a Fast and Intuitive Tool for Analysis of Whole Genome and Metagenomic Sequence Data
Source: PubMed Central journal article supplement (PMC4508097; doi:10.1371/journal.pone.0133816), 2015-07-20
Supplement: pone.0133816.s002.pdf [file pone.0133816.s002.pdf]

CORRECTION

# Correction: TreeSeq, a Fast and Intuitive Tool for Analysis of Whole Genome and Metagenomic Sequence Data

**Bastiaan B. Wintermans, Bernd W. Brandt, Christina M. J. E. Vandenbroucke-Grauls, Andries E. Budding**

The authors' names are listed incorrectly. The correct names are: Bastiaan B. Wintermans, Bernd W. Brandt, Christina M. J. E. Vandenbroucke-Grauls, and Andries E. Budding. The correct citation is: Wintermans BB, Brandt BW, Vandenbroucke-Grauls CMJE, Budding AE (2015) TreeSeq, a Fast and Intuitive Tool for Analysis of Whole Genome and Metagenomic Sequence Data. PLoS ONE 10(5): e0123851. doi:[10.1371/journal.pone.0123851](https://doi.org/10.1371/journal.pone.0123851)

## Reference

1. Wintermans B, Brandt B, Vandenbroucke-Grauls C, Budding A (2015) TreeSeq, a Fast and Intuitive Tool for Analysis of Whole Genome and Metagenomic Sequence Data. PLoS ONE 10(5): e0123851. doi: [10.1371/journal.pone.0123851](https://doi.org/10.1371/journal.pone.0123851) PMID: [25933115](https://pubmed.ncbi.nlm.nih.gov/25933115/)

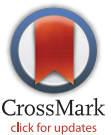

## OPEN ACCESS

**Citation:** Wintermans BB, Brandt BW, Vandenbroucke-Grauls CMJE, Budding AE (2015) Correction: TreeSeq, a Fast and Intuitive Tool for Analysis of Whole Genome and Metagenomic Sequence Data. PLoS ONE 10(6): e0131379. doi:[10.1371/journal.pone.0131379](https://doi.org/10.1371/journal.pone.0131379)

**Published:** June 22, 2015

**Copyright:** © 2015 Wintermans et al. This is an open access article distributed under the terms of the [Creative Commons Attribution License](https://creativecommons.org/licenses/by/4.0/), which permits unrestricted use, distribution, and reproduction in any medium, provided the original author and source are credited.
